# Supplementary material for: Factors that influence Cape fur seal predation on Cape gannets at Lambert’s Bay, South Africa
Source: PeerJ journal article supplement (doi:10.7717/peerj.13416), 2022-06-13
Supplement: SOM_Table_S2.pdf [file SOM_Table_S2.pdf]

Table S2: The results of the unstandardized Generalised Linear Model with a binomial distribution testing how the different factors influence Cape Gannet fledgling predation probability between 2007 to 2018 (excluding 2009 and 2011) with predation probability as the response variable, and the explanatory variables being presence and absence of culling, total fish biomass and the number of fledglings available in the water for the seals to predate upon at Lambert's Bay Cape Gannet colony, South Africa.

| <b>Generalised Linear Model</b> | <b>Estimate</b> | <b>Standard error</b> | <b>Z value</b> | <b>P value</b> |
|---------------------------------|-----------------|-----------------------|----------------|----------------|
| Intercept                       | -1.05600        | 0.06763               | -22.277        | 0.001*         |
| Number of fledglings            | -0.00002067     | 0.00001180            | -17.514        | 0.001*         |
| Culling                         | 0.3240          | 0.04012               | 8.075          | 0.001*         |
| Fish biomass                    | -0.000001589    | 0.0000003181          | -4.993         | 0.001*         |
